# Supplementary material
Source: PubMed Central journal article supplement (PMC8735666)
Supplement: NIHMS1763602-supplement-supplementary_information.pdf [file NIHMS1763602-supplement-supplementary_information.pdf]

## Supporting Information

### **S-Nitroso-N-Acetyl-L-Cysteine Ethyl Ester (SNACET) Catheter Lock Solution to Reduce Catheter-Associated Infections**

Rajnish Kumar, Hamed Massoumi, Manjyot Kaur Chug, Elizabeth J. Brisbois\*

School of Chemical, Materials and Biomedical Engineering, University of Georgia, Athens, GA  
30602, United States

\*Corresponding Author:

Dr. Elizabeth J. Brisbois

School of Chemical, Materials, and Biomedical Engineering

University of Georgia

220 Riverbend Road

Athens, GA 30602

Telephone: (706) 542-1243

E-mail: [ejbrisbois@uga.edu](mailto:ejbrisbois@uga.edu)

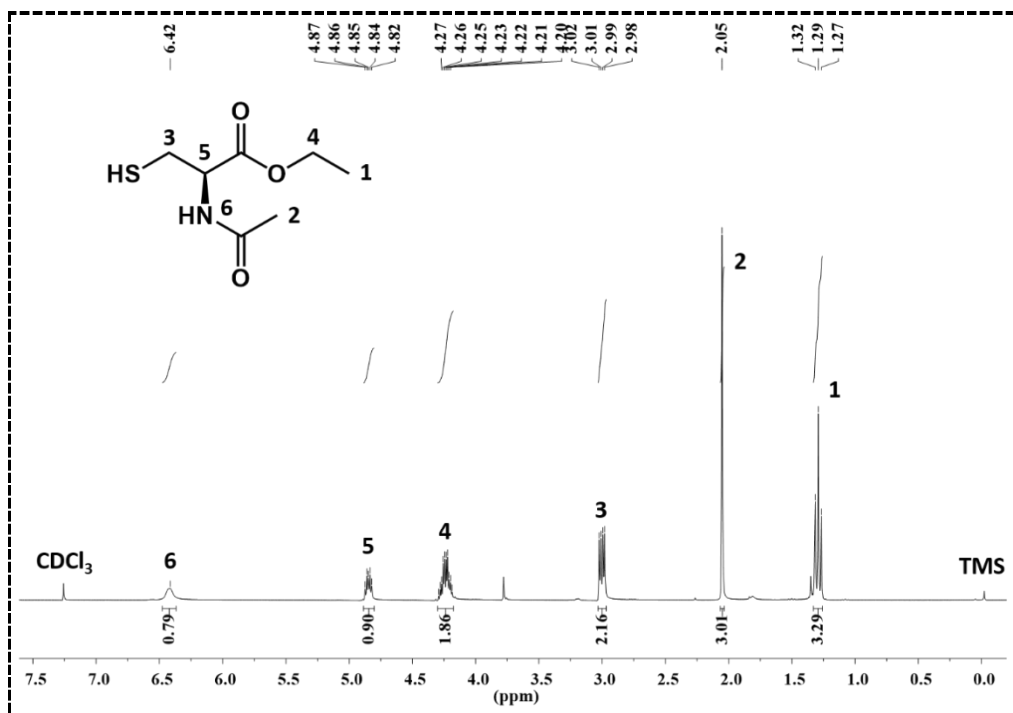

Figure S1. <sup>1</sup>H NMR spectra of NACET.

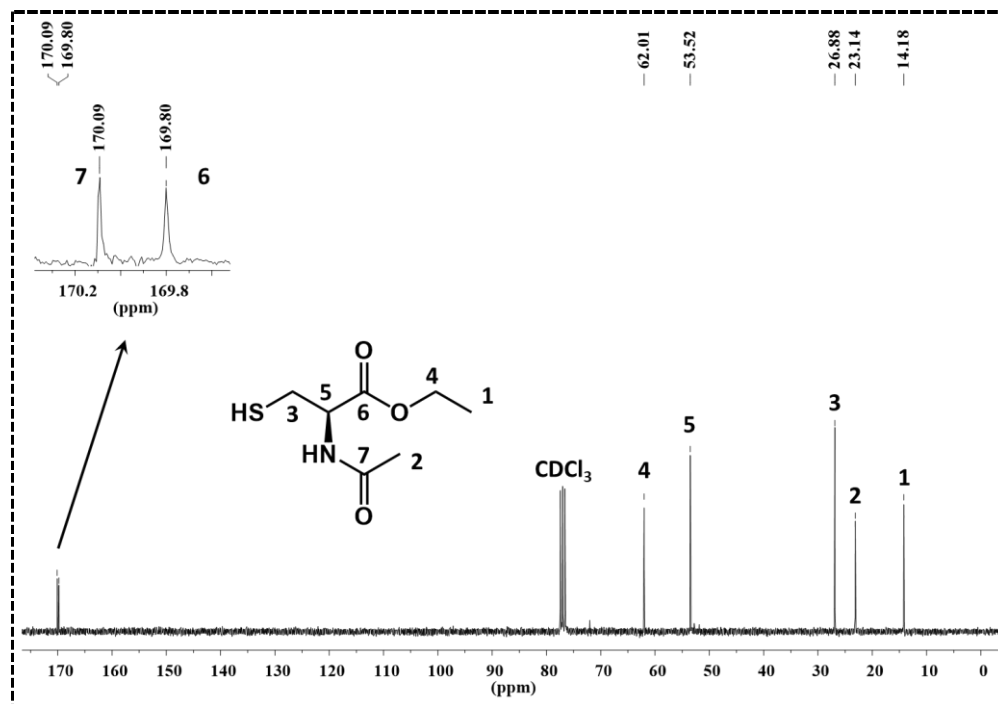

Figure S2. <sup>13</sup>C NMR spectra of NACET.

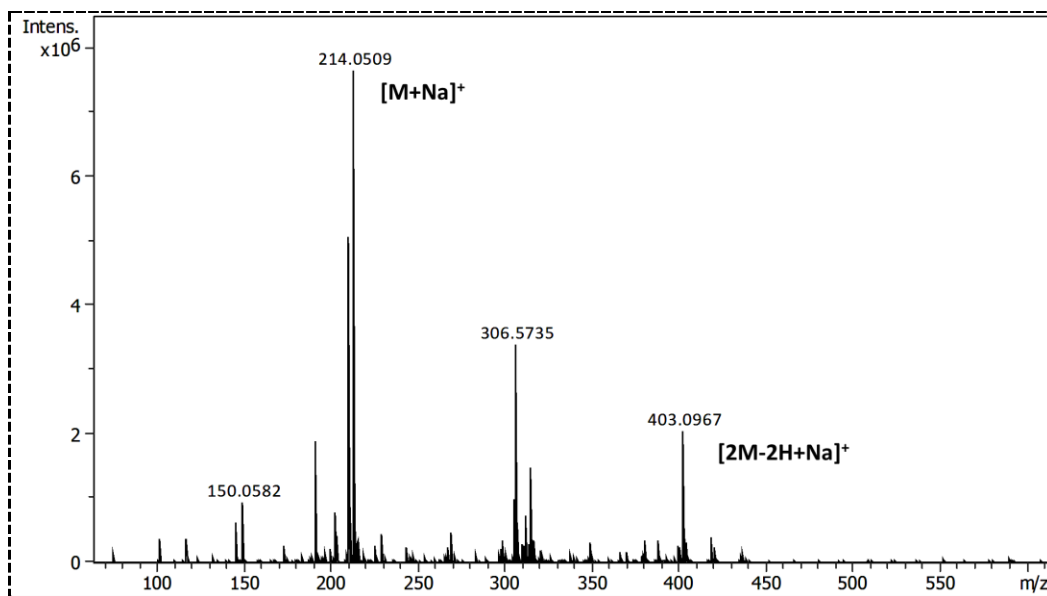

**Figure S3.** HRMS (ESI) spectra of NACET.

**Table S1.** Characteristic IR band of NACET and SNACET

| Functional group        | Frequency ( $\nu$ ) (cm <sup>-1</sup> ) |
|-------------------------|-----------------------------------------|
| -N-H Stretch (2° Amine) | 3350-3310                               |
| -C-H Stretch (Alkane)   | 3000-2840                               |
| -S-H Stretch (Thiol)    | 2600-2550                               |
| -C=O Stretch (Ester)    | 1750-1735                               |
| -C=O Stretch (Amide)    | 1680-1650                               |
| -N-H bending (Alkane)   | 1650-1530                               |
| -N-H bending (Alkane)   | 1380-1310                               |
| -C-O stretching (Ester) | 1210-1163                               |
| -C-N stretching         | 1020-1200                               |
| -C-H bending (Alkane)   | 880-700                                 |
